# Supplementary material
Source: PubMed Central journal article supplement (PMC3169828)
Supplement: mmc1.pdf [file mmc1.pdf]

**The American Journal of Human Genetics, Volume 89  
Supplemental Data**

**Epistatic Selection between Coding and Regulatory  
Variation in Human Evolution and Disease**

**Tuuli Lappalainen, Stephen B. Montgomery, Alexandra C. Nica, and Emmanouil T. Dermitzakis**

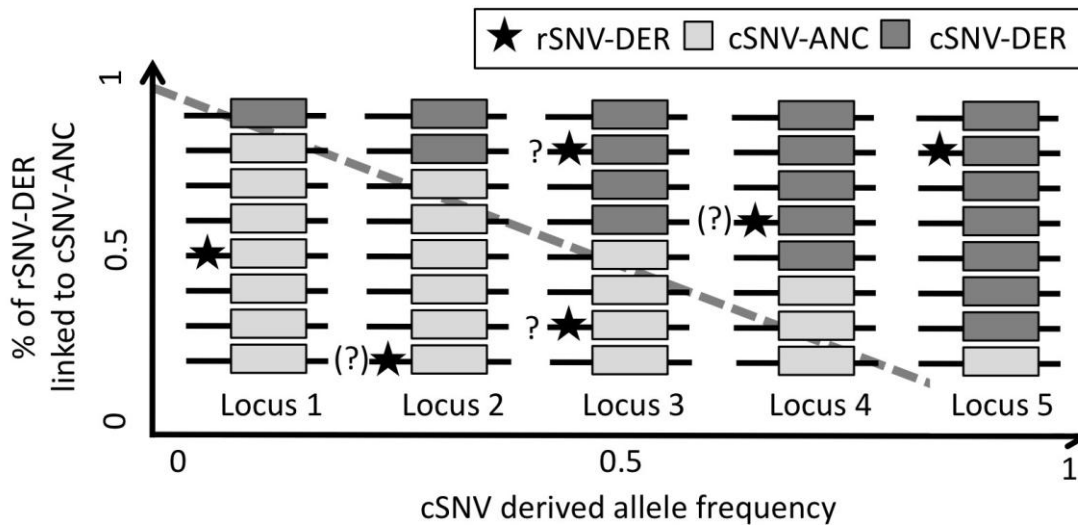

**Figure S1. The approach for predicting the direction of expression change from allele-specific expression (ASE) data.** In ASE data, only the coding variants (boxes) are observed. A new random regulatory mutation leading to a rare ASE event (stars) will hit the haplotype carrying the ancestral allele of a coding variant with the probability that equals the ancestral allele frequency. Thus, especially for rare ASE putatively caused by recent regulatory mutation, if the cSNVs DAF is low, the new derived rSNV allele is more likely to be linked to the common cSNV ancestral allele. In such a case, whether the cSNV ancestral allele is higher or lower expressed is informative of whether the new rSNV increases or decreases gene expression. Similarly, for cSNVs with high DAF, the common cSNV derived allele is likely to be linked to the new rSNV derived allele, and be informative of the direction of effect. This approach is expected to be informative of the direction of gene expression change induced by regulatory mutations especially when analyzing rare ASE events of neutral cSNVs – for common regulatory variants the linkage has sometimes been broken by recombination, and functional cSNVs may be affected by selection.

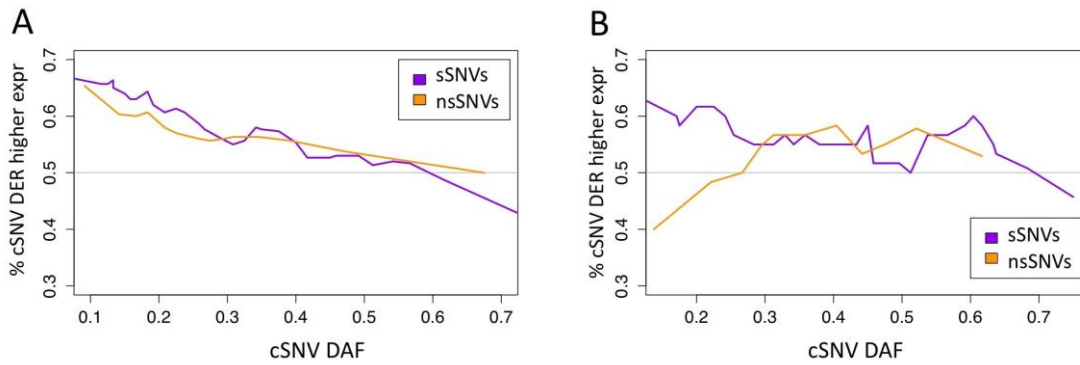

**Figure S2. Expression of coding variants based on allele-specific expression data.** The proportion of cSNVs with ASE where the derived allele is higher expressed for rare ASE (a;  $\leq 2$  heterozygotes with ASE of  $\geq 6$  heterozygote individuals), and for common ASE (b;  $\geq 5$  heterozygotes with ASE of  $\geq 6$  heterozygote individuals) – see Figure 3c for all cSNVs with ASE. The decreasing trend especially in (a) but also in the other cases is likely to result from the phenomenon illustrated in Supplementary Figure 3, indicating that the cSNV allele that is more likely to be linked to a rare, recent regulatory variant is usually lower expressed (in  $78 \pm 12\%$  of the cases at cSNV DAF=0 according to a linear regression model of sSNVs in (a),  $p = 2.1 \times 10^{-10}$ ). This may be due to new regulatory mutation being more likely to lead to loss of gene expression, and/or due to a selective process leading to accumulation of rare loss-of-expression rSNVs. The overall difference between sSNVs and nsSNVs is not significant in (a) and (b), based on linear regression. However, since the trend in (b) does not appear linear for nsSNVs, we also tested sSNV-nsSNV difference with a Fisher test for cSNVs with DAF $<0.15$ , yielding p-values of 0.92 for (a) and 0.015 for (b).

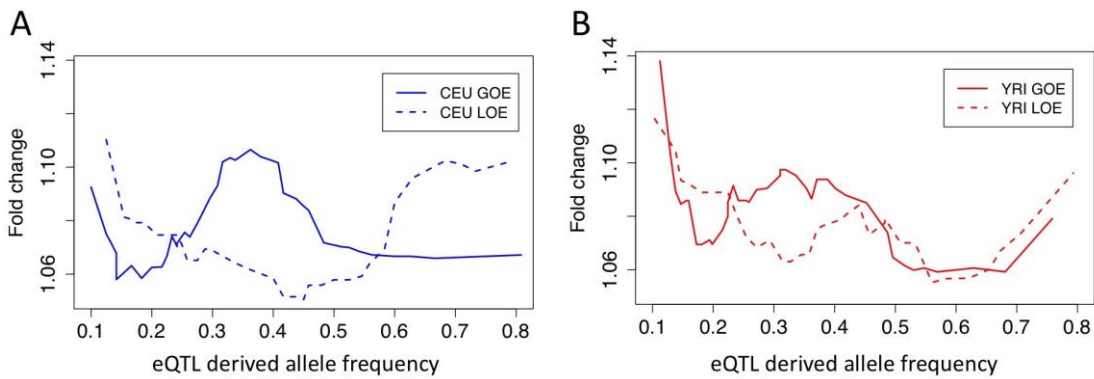

**Figure S3. eQTL impact size.** Fold change of gene expression for gain-of-expression (GOE) and loss-of-expression (LOE) eQTLs in CEU (a) and YRI (b) as a median in sliding windows of 50 SNPs with an overlap of 5 SNPs. The figure shows how eQTLs especially in CEU have very high fold changes in the parts of the frequency spectrum where they putatively lead to protective, beneficial epistatic effects. The enrichment of high fold changes in very low derived allele frequencies is probably due to cases where gene expression level change itself is deleterious, with selection preventing eQTLs causing major changes from reaching high frequencies. Of note, especially in CEU this signal of selective constraint on expression levels is not any stronger than the patterns putatively caused by epistatic selection, suggesting that epistasis has a profound effect on regulatory variation.

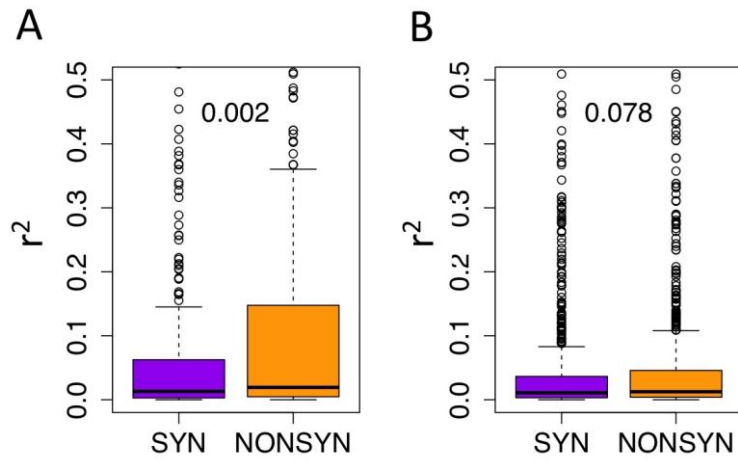

**Figure S4. Linkage disequilibrium ( $r^2$ ) between eQTLs and coding variants.** LD between eQTLs and synonymous or nonsynonymous coding SNVs  $r^2$  in CEU (a) and YRI (b). The synonymous SNVs were sampled to the derived allele frequency distribution of nonsynonymous SNVs, and the numbers denote the Mann-Whitney p-values for sSNV–nsSNV comparisons.

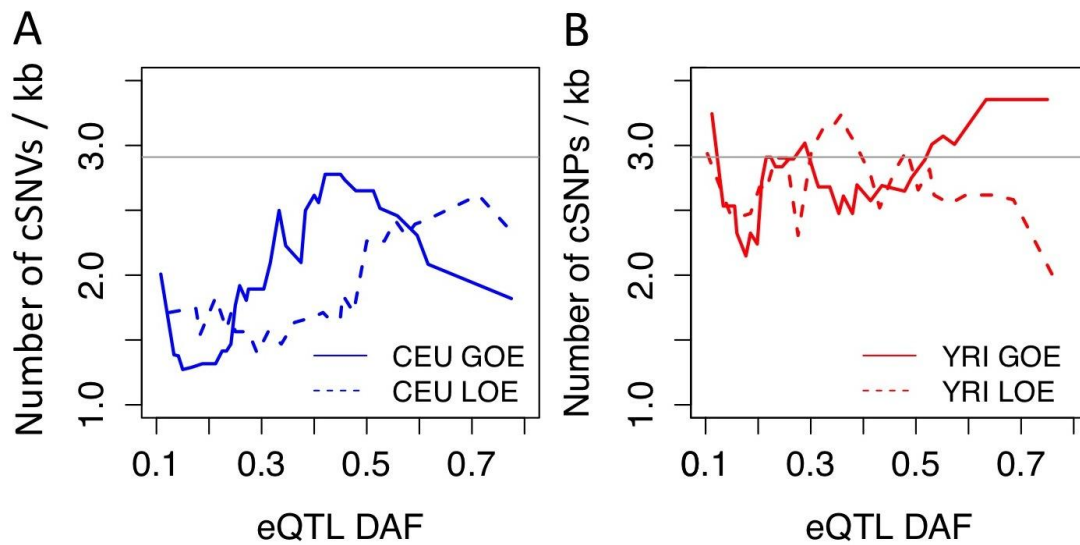

**Figure S5. Deficiency of coding variation in eQTL genes.** The number of segregating coding sites in CEU (a) and YRI (b) genes with gain-of-expression (GOE) and loss-of-expression (LOE) eQTLs, as a mean in sliding windows on 50 SNPs with an overlap of 5 SNPs. The vertical line shows the median cSNV density of genes without eQTLs in this dataset. The lower number of cSNVs in eQTL genes ( $p < 2.2 \times 10^{-16}$  in CEU and  $p = 6.4 \times 10^{-3}$  in YRI) suggests increased purifying selection against cSNVs in the presence of regulatory variation, a phenomenon that appears even more pronounced in genes with high frequency of the higher expressed eQTL haplotype, when many coding mutations hit the higher expressed haplotype. The pattern is similar for both nonsynonymous and synonymous variants (data not shown); even though epistatic selection is expected to act mainly on the former, it may increase background selection that affects neutral synonymous variants as well.

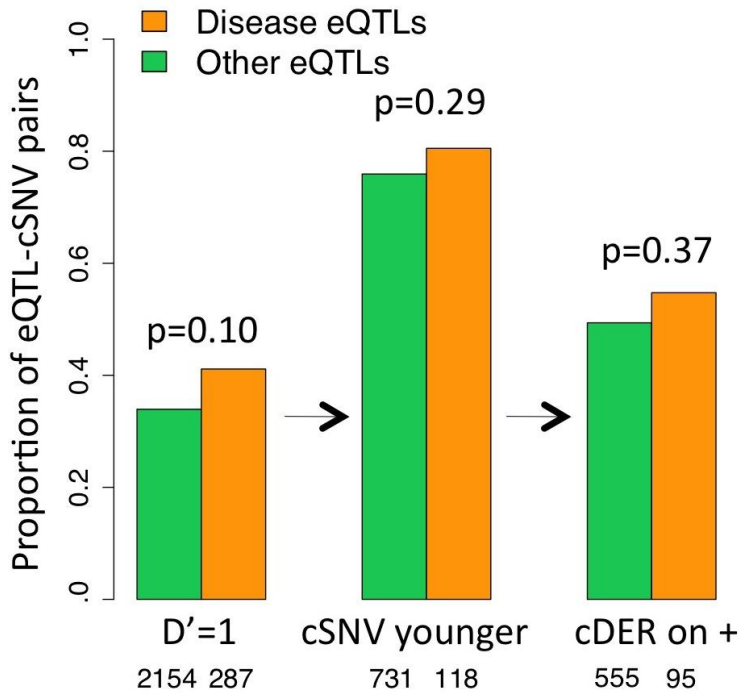

**Figure S6. Coding variation in disease-associated eQTLs.** Disease-associated eQTLs show a slight, nonsignificant trend of having more coding SNVs in full LD with the eQTL, having a bigger proportion of these cSNVs younger than the eQTL variant, and of these having the cSNV mutation more often occurring on the higher expressed haplotype. The numbers below the bars denote the total number of coding variants tested in each category (denominators of the proportions); the p-values are from Fisher tests.

**Table S1. The epistasis model.** The two-locus haplotypes have regulatory variation with gain-of-expression (G) and loss-of-expression (L) alleles with frequencies  $p_G$  and  $p_L = 1 - p_G$ , and coding variation with wild type (w) and deleterious mutant (m) alleles with frequencies  $p_w$  and  $p_m = 1 - p_w$ . Selection coefficient of the m allele is denoted by  $s$ , dominance by  $h$ , mutation rate  $w \rightarrow m$  by  $\mu$ , and the penetrance effect of the regulatory variant by  $i$ .

| Genotype    | Fitness               | Frequency                                |
|-------------|-----------------------|------------------------------------------|
| $G_w / G_w$ | 1                     | $[p_G(p_w - \mu p_G)]^2$                 |
| $L_w / L_w$ | 1                     | $[p_L(p_w - \mu p_L)]^2$                 |
| $G_w / L_w$ | 1                     | $2p_G(p_w - \mu p_G) p_L(p_w - \mu p_L)$ |
| $G_w / G_m$ | $1 - hs$              | $2p_G(p_w - \mu p_G) p_G(p_m + \mu p_G)$ |
| $L_w / L_m$ | $1 - hs$              | $2p_L(p_w - \mu p_L) p_L(p_m + \mu p_L)$ |
| $G_m / L_w$ | $1 - [i + (1 - i)h]s$ | $2p_G(p_m + \mu p_G) p_L(p_w - \mu p_L)$ |
| $G_w / L_m$ | $1 - (1 - i)hs$       | $2p_G(p_w - \mu p_G) p_L(p_m + \mu p_L)$ |
| $G_m / L_m$ | $1 - s$               | $2p_G(p_m + \mu p_G) p_L(p_m + \mu p_L)$ |
| $L_m / L_m$ | $1 - s$               | $[p_L(p_m + \mu p_L)]^2$                 |
| $G_m / G_m$ | $1 - s$               | $[p_G(p_m + \mu p_G)]^2$                 |



**Table S2. Comparison of coding variation on the eQTL haplotypes.** The table shows the distribution of coding variation for cSNVs that were in full LD ( $D' = 1$ ) with the eQTL variant and likely more recent than that, assessed from the haplotype counts. The data suggests a stronger deficiency of derived alleles on the higher expressed (+) haplotype for nonsynonymous variants in CEU, compared to synonymous variants. However, also synonymous variants show underrepresentation of derived alleles on the higher expressed haplotype. This is likely due to both new nonsynonymous and synonymous mutations hitting more often the lower expressed eQTL haplotype due to its higher frequency (Figure 2), as well as increased background selection on the higher expressed haplotype. The p-values are from chi-squared tests for whether the observations are significantly different from even proportions of derived alleles on higher and lower expressed haplotypes, and the p-values for comparison between sSNVs and nsSNVs are based on Fisher's exact test.

|               |                  | CEU          |             |                       |                      | YRI          |             |                       |                 |
|---------------|------------------|--------------|-------------|-----------------------|----------------------|--------------|-------------|-----------------------|-----------------|
|               |                  | % on + haplo | Total count | p-value               | p-value s/nsSNV      | % on + haplo | Total count | p-value               | p-value s/nsSNV |
| allele counts | All cSNP         | 45.0         | 38223       | $1.3 \times 10^{-85}$ | NA                   | 48.3         | 43665       | $1.3 \times 10^{-12}$ | NA              |
|               | sSNP             | 45.9         | 20535       | $2.0 \times 10^{-32}$ | $2.1 \times 10^{-4}$ | 48.0         | 23706       | $1.4 \times 10^{-9}$  | 0.222           |
|               | nsSNP            | 44.0         | 17688       | $6.1 \times 10^{-58}$ |                      | 48.6         | 19959       | $1.0 \times 10^{-4}$  |                 |
|               | sSNP DAF < 0.05  | 50.4         | 446         | 0.850                 | 0.1277               | 46.1         | 848         | 0.023                 | 0.423           |
|               | nsSNP DAF < 0.05 | 45.4         | 465         | 0.046                 |                      | 48.0         | 964         | 0.221                 |                 |
| SNP counts    | All cSNP         | 48.6         | 327         | 0.619                 | NA                   | 47.3         | 656         | 0.160                 | NA              |
|               | sSNP             | 51.9         | 158         | 0.633                 | 0.2695               | 45.0         | 300         | 0.083                 | 0.308           |
|               | nsSNP            | 45.6         | 169         | 0.249                 |                      | 49.2         | 356         | 0.751                 |                 |
|               | sSNP DAF < 0.05  | 55.4         | 92          | 0.297                 | 0.0590               | 43.5         | 177         | 0.084                 | 0.309           |
|               | nsSNP DAF < 0.05 | 41.2         | 97          | 0.084                 |                      | 49.1         | 214         | 0.785                 |                 |

**Table S3. Candidate loci for epistatic disease associations.** Disease-associated eQTLs with a high frequency of the higher expressed haplotype that may be good candidate loci for disease association arising from increased penetrance of deleterious coding variants. eQTL effects GOE and LOE denote gain and loss-of-expression, and the tissue abbreviations stand for fibroblasts, T-cells and LCLs.

| eQTL SNP   | eQTL gene                | eQTL effect | + allele freq | GWAS SNP             | Phenotype                                | Tissue      | RTC score  |
|------------|--------------------------|-------------|---------------|----------------------|------------------------------------------|-------------|------------|
| rs4759113  | ENSG00000094914_AAAS     | GOE         | 0.5282        | rs10876432           | Bone mineral density (spine)             | FIBR        | 0.88       |
| rs10774967 | ENSG00000111445_RFC5     | GOE         | 0.6294        | rs10444502           | Biochemical measures                     | FIBR        | 0.92       |
| rs2073643  | ENSG00000197375_SLC22A5  | GOE         | 0.5647        | rs2188962            | Crohns disease                           | FIBR        | 0.84       |
| rs12477063 | ENSG00000138376_BARD1    | GOE         | 0.5627        | rs6435862            | Neuroblastoma (high-risk)                | TCELL       | 0.97       |
| rs1321311  | ENSG00000146192_FGD2     | GOE         | 0.7606        | rs1321311            | Electrocardiographic traits              | TCELL       | 1.00       |
| rs7117022  | ENSG00000185507_IRF7     | GOE         | 0.7817        | rs4963128            | Systemic lupus erythematosus             | TCELL       | 0.86       |
| rs2524094  | ENSG00000204371_EHMT2    | GOE         | 0.6161        | rs9264942            | HIV-1 control                            | TCELL       | 1.00       |
| rs12603332 | ENSG00000073605_GSDML    | GOE         | 0.548         | rs2290400            | Type 1 diabetes                          | BCELL       | 0.97       |
| rs6060355  | ENSG00000101019_UQCC     | GOE         | 0.5857        | rs6060369            | Height                                   | BCELL       | 1.00       |
| rs3843935  | ENSG00000164978_NUDT2    | GOE         | 0.6743        | rs216345             | Bipolar disorder                         | BCELL       | 1.00       |
| rs6918423  | ENSG00000181315_ZNF322A  | GOE         | 0.7163        | rs13194053           | Schizophrenia                            | BCELL       | 0.81       |
| rs3812558  | ENSG00000187796_CARD9    | GOE         | 0.6426        | rs10781500           | Ulcerative colitis                       | BCELL       | 1.00       |
| rs3130474  | ENSG00000204498_NFKBIL1  | GOE         | 0.6089        | rs9264942            | HIV-1 control                            | BCELL       | 0.95       |
| rs270607   | ENSG00000053108_FSTL4    | LOE         | 0.7145        | rs1016988            | Fibrinogen                               | FIBR        | 0.80       |
| rs744166   | ENSG00000126561_STAT5A   | LOE         | 0.5446        | rs744166             | Multiple sclerosis                       | FIBR        | 1.00       |
| rs12150376 | ENSG00000141200_KIF2B    | LOE         | 0.787         | rs8073783            | Conduct disorder (interaction)           | FIBR        | 0.98       |
| rs1567438  | ENSG00000146457_WTAP     | LOE         | 0.6544        | rs6919346            | Plasma Lp (a) levels                     | FIBR        | 0.81       |
| rs7644602  | ENSG00000153551_CMTM7    | LOE         | 0.6303        | rs4380451            | Bipolar disorder                         | FIBR        | 0.91       |
| rs758642   | ENSG00000172146_OR1A1    | LOE         | 0.6813        | rs758642             | Smoking behavior                         | FIBR        | 1.00       |
| rs214053   | ENSG00000197061_HIST1H4C | LOE         | 0.5246        | rs742132             | Serum uric acid                          | FIBR        | 0.95       |
| rs2270196  | ENSG00000204920_ZNF155   | LOE         | 0.6373        | rs2191566            | Acute lymphoblastic leukemia (childhood) | FIBR        | 0.91       |
| rs10946208 | ENSG00000071242_RPS6KA2  | LOE         | 0.6962        | rs2301436            | Crohns disease                           | TCELL       | 0.80       |
| rs2732588  | ENSG00000073969_NSF      | LOE         | 0.625         | rs199533             | Parkinsons disease                       | TCELL       | 0.91       |
| rs11577406 | ENSG00000133059_RIPK5    | LOE         | 0.7668        | rs1668873, rs1668873 | Mean platelet volume                     | FIBR, TCELL | 0.83, 0.85 |
| rs11953346 | ENSG00000133302_BRCTD1   | LOE         | 0.7993        | rs17418283           | Bipolar disorder                         | TCELL       | 0.90       |
| rs4310388  | ENSG00000142606_MMEL1    | LOE         | 0.5739        | rs3890745            | Rheumatoid arthritis                     | TCELL       | 0.98       |
| rs3812584  | ENSG00000148384_INPP5E   | LOE         | 0.5972        | rs10781500           | Ulcerative colitis                       | TCELL       | 0.90       |
| rs10035791 | ENSG00000158985_CDC42SE2 | LOE         | 0.8445        | rs7731657            | Fasting plasma glucose                   | TCELL       | 1.00       |
| rs10851872 | ENSG00000167173_C15orf39 | LOE         | 0.8785        | rs1378942            | Diastolic blood pressure                 | TCELL       | 0.91       |
| rs12534124 | ENSG00000172209_GPR22    | LOE         | 0.8612        | rs3815148            | Osteoarthritis                           | TCELL       | 0.98       |
| rs10962263 | ENSG00000173068_BNC2     | LOE         | 0.8564        | rs1927702            | Body mass index                          | TCELL       | 0.93       |
| rs803686   | ENSG00000184779_RPS17    | LOE         | 0.7465        | rs783540             | Chronic lymphocytic leukemia             | TCELL       | 0.83       |
| rs13219354 | ENSG00000186470_BTN3A2   | LOE         | 0.9208        | rs13194053           | Schizophrenia                            | TCELL       | 0.96       |

|            |                           |     |        |                                       |                                                         |                          |                        |
|------------|---------------------------|-----|--------|---------------------------------------|---------------------------------------------------------|--------------------------|------------------------|
| rs363564   | ENSG00000186924_KRTAP22-1 | LOE | 0.8246 | rs363512                              | Hyperactive-impulsive symptoms                          | TCELL                    | 0.80                   |
| rs3778709  | ENSG00000187037_GPR141    | LOE | 0.6441 | rs741301                              | Diabetic nephropathy                                    | TCELL                    | 0.98                   |
| rs2071286  | ENSG00000204305_AGER      | LOE | 0.8163 | rs2269426                             | Plasma eosinophil count                                 | TCELL                    | 0.84                   |
| rs4151672  | ENSG00000204348_DOM3Z     | LOE | 0.9571 | rs494620                              | Menopause (age at onset)                                | TCELL                    | 0.82                   |
| rs9533101  | ENSG0000023516_AKAP11     | LOE | 0.6316 | rs9594759                             | Bone mineral density (spine)                            | BCELL                    | 0.84                   |
| rs1946294  | ENSG00000089225_TBX5      | LOE | 0.9435 | rs3825214                             | Electrocardiographic traits                             | BCELL                    | 0.81                   |
| rs5751901  | ENSG00000100031_GGT4P     | LOE | 0.5985 | rs5751901                             | Protein quantitative trait loci                         | BCELL                    | 1.00                   |
| rs757110   | ENSG00000110696_C11orf58  | LOE | 0.7165 | rs5215                                | Type 2 diabetes                                         | BCELL                    | 0.96                   |
| rs10920046 | ENSG00000118194_TNNT2     | LOE | 0.7376 | rs7512898                             | Electrocardiographic conduction measures                | BCELL                    | 0.91                   |
| rs3789311  | ENSG00000119396_RAB14     | LOE | 0.8292 | rs3761847,<br>rs3761847,<br>rs3761847 | Rheumatoid arthritis                                    | FIBR,<br>BCELL,<br>TCELL | 0.88,<br>0.89,<br>0.81 |
| rs8018822  | ENSG00000125375_ATP5S     | LOE | 0.7553 | rs8020441                             | Cognitive performance                                   | BCELL                    | 1.00                   |
| rs535716   | ENSG00000142102_ATHL1     | LOE | 0.7836 | rs11602954                            | Mean platelet volume                                    | BCELL                    | 0.95                   |
| rs7127239  | ENSG00000148943_LIN7C     | LOE | 0.7165 | rs7481311                             | Weight                                                  | BCELL                    | 1.00                   |
| rs770213   | ENSG00000155158_C9orf52   | LOE | 0.6197 | rs1927702                             | Body mass index                                         | BCELL                    | 0.92                   |
| rs9303277  | ENSG00000172057_ORMDL3    | LOE | 0.5229 | rs907092,<br>rs7216389,<br>rs2872507  | Primary biliary cirrhosis,Asthma,Crohns disease         | BCELL                    | 0.89                   |
| rs9272346  | ENSG00000179344_HLA-DQB1  | LOE | 0.5601 | rs9272346,<br>rs9268480,<br>rs660895  | Type 1 diabetes,Ulcerative colitis,Rheumatoid arthritis | BCELL                    | 1.00                   |
